# Supplementary material for: An open-source, end-to-end workflow for multidimensional photoemission spectroscopy
Source: Springer Nature journal article supplement (doi:10.1038/s41597-020-00769-8), 2020-12-17
Supplement: 41597_2020_769_MOESM1_ESM.pdf [file 41597_2020_769_MOESM1_ESM.pdf]

# Supplementary Information

## An open-source, end-to-end workflow for multidimensional photoemission spectroscopy

R. Patrick Xian<sup>1\*</sup>, Y. Acremann<sup>2</sup>, Steinn Y. Agustsson<sup>3</sup>, Maciej Dendzik<sup>1</sup>, Kevin Bühlmann<sup>2</sup>, Davide Curcio<sup>4</sup>, Dmytro Kutnyakhov<sup>5,6</sup>, Federico Pressacco<sup>6</sup>, Michael Heber<sup>5</sup>, Shuo Dong<sup>1</sup>, Tommaso Pincelli<sup>1</sup>, Jure Demsar<sup>3</sup>, Wilfried Wurth<sup>5,6,†</sup>, Philip Hofmann<sup>4</sup>, Martin Wolf<sup>1</sup>, Markus Scheidgen<sup>1,7</sup>, Laurenz Rettig<sup>1\*</sup>, and Ralph Ernstorfer<sup>1\*</sup>

<sup>1</sup> Fritz Haber Institute of the Max Planck Society, 14195 Berlin, Germany

<sup>2</sup> Laboratory for Solid State Physics, ETH Zurich, 8093 Zurich, Switzerland

<sup>3</sup> Institute of Physics, University of Mainz, 55128 Mainz, Germany

<sup>4</sup> Department of Physics and Astronomy, Interdisciplinary Nanoscience Center (iNANO), Aarhus University, 8000 Aarhus C, Denmark

<sup>5</sup> DESY Photon Science, 22607 Hamburg, Germany

<sup>6</sup> Department of Physics, University of Hamburg, 22761 Hamburg, Germany

<sup>7</sup> Department of Physics, Humboldt University of Berlin, 12489 Berlin, Germany

†Deceased

\*Corresponding authors: [xian@fhi-berlin.mpg.de](mailto:xian@fhi-berlin.mpg.de), [rettig@fhi-berlin.mpg.de](mailto:rettig@fhi-berlin.mpg.de), [ernstorfer@fhi-berlin.mpg.de](mailto:ernstorfer@fhi-berlin.mpg.de)

## Table of Contents

|                                                      |          |
|------------------------------------------------------|----------|
| <b>S1 Metadata parameters and descriptions</b> ..... | <b>2</b> |
| <b>Supplementary Table 1</b> .....                   | <b>2</b> |
| <b>Supplementary Table 2</b> .....                   | <b>3</b> |
| <b>Supplementary Table 3</b> .....                   | <b>4</b> |
| <b>Supplementary Table 4</b> .....                   | <b>5</b> |
| <b>References</b> .....                              | <b>5</b> |

## S1 Metadata parameters and descriptions

Supplementary Tables 1-4 list categorized parameters currently enlisted (version 1.0) as metadata for data deposition and parsing by the experimental materials science section of the NOMAD database [1]. Each parameter contains a name, unit, description, and lineage (i.e. immediate parent in the parameter tree), as implemented in `parser-mpes` [2]. For each parameter entry, providing “None” means “not applicable to the particular experiment or quantity, unknown or undetermined during the period of experiment”.

**Supplementary Table 1: List of current general parameters.**

| Name                | Unit | Description                                            |
|---------------------|------|--------------------------------------------------------|
| experiment_location | None | Name of the city and country the experiment took place |
| experiment_date     | None | Start and end dates of the experiment                  |
| experiment_summary  | None | Descriptive summary of the content of the experiment   |
| institution         | None | Name of the institution hosting the facility           |
| facility            | None | Name of the experimental facility (e.g. in an acronym) |
| beamline            | None | Name of the beamline the experiment took place         |
| source_pump         | None | Name or model of the pump light source                 |
| source_probe        | None | Name or model of the probe light source                |
| equipment           | None | Name or model of the equipment (e.g. in an acronym)    |
| sample              | None | Description of the sample used in the experiment       |
| measurement_axis    | None | Names of the axes in measurement hardware              |
| physical_axis       | None | Names of the axes in physical terms                    |

**Supplementary Table 2: List of current source parameters**

| Name                 | Unit               | Description                                                                              |
|----------------------|--------------------|------------------------------------------------------------------------------------------|
| pump_rep_rate        | Hz                 | Repetition rate of the pump source                                                       |
| pump_pulse_duration  | fs                 | Pulse duration of the pump source                                                        |
| pump_wavelength      | nm                 | Center wavelength of the pump source                                                     |
| pump_spectrum        | None               | Spectrum of the pump source                                                              |
| pump_photon_energy   | eV                 | Photon energy of the pump source                                                         |
| pump_size            | mm <sup>2</sup>    | Full-width at half-maximum size of the pump source at or closest to the sample position  |
| pump_fluence         | mJ/mm <sup>2</sup> | Fluence of the pump source at or closest to the sample position                          |
| pump_polarization    | None               | Polarization of the pump source                                                          |
| pump_bunch           | None               | Total bunch number of the pump source                                                    |
| probe_rep_rate       | Hz                 | Repetition rate of the probe source                                                      |
| probe_pulse_duration | fs                 | Pulse duration of the probe source                                                       |
| probe_wavelength     | nm                 | Center wavelength of the probe source                                                    |
| probe_spectrum       | None               | Spectrum of the probe source                                                             |
| probe_photon_energy  | eV                 | Photon energy of the probe source                                                        |
| probe_size           | mm <sup>2</sup>    | Full-width at half-maximum size of the probe source at or closest to the sample position |
| probe_fluence        | mJ/mm <sup>2</sup> | Fluence of the probe source at or closest to the sample position                         |
| probe_polarization   | None               | Polarization of the probe source                                                         |
| probe_bunch          | None               | Total bunch number of the probe source                                                   |
| temporal_resolution  | fs                 | Full-width at half-maximum of the pump-probe cross-correlation function                  |

**Supplementary Table 3: List of current detector parameters**

| Name                | Unit              | Description                                                        |
|---------------------|-------------------|--------------------------------------------------------------------|
| extractor_voltage   | V                 | Voltage between the extractor and the sample                       |
| work_distance       | mm                | Distance between the sample and the detector entrance              |
| lens_names          | None              | Set of names for the electron-optic lenses                         |
| lens_voltages       | V                 | Set of electron-optic lens voltages                                |
| tof_distance        | m                 | Drift distance of the time-of-flight tube                          |
| tof_voltage         | V                 | Voltage applied to the time-of-flight tube                         |
| sample_bias         | V                 | Voltage bias applied to sample                                     |
| magnification       | None              | Detector magnification                                             |
| detector_voltage    | V                 | Voltage applied to detector                                        |
| detector_type       | None              | Description of the detector type (e.g. 'MCP', 'CCD', 'CMOS', etc.) |
| sensor_size         | mm                | Size of each of the imaging sensor chip on the detector            |
| sensor_count        | None              | Number of imaging sensor chips on the detector                     |
| sensor_pixel_size   | $\mu\text{m}$     | Pixel size of the imaging sensor chip on the detector              |
| x_to_momentum       | $\text{\AA}^{-1}$ | Pixel x axis to $k_x$ momentum calibration                         |
| y_to_momentum       | $\text{\AA}^{-1}$ | Pixel y axis to $k_y$ momentum calibration                         |
| tof_to_energy       | eV                | Time-of-flight to energy calibration                               |
| stage_to_delay      | fs                | Translation stage delay to pump-probe delay calibration            |
| other_converts      | None              | Conversion factor between other measured and physical axes         |
| momentum_resolution | $\text{\AA}^{-1}$ | Momentum resolution of the detector                                |
| spatial_resolution  | $\mu\text{m}$     | Spatial resolution of the source                                   |
| energy_resolution   | eV                | Energy resolution of the detector                                  |

**Supplementary Table 4: List of current sample parameters.**

| Name                | Unit | Description                                                                                                                                                  |
|---------------------|------|--------------------------------------------------------------------------------------------------------------------------------------------------------------|
| sample_id           | None | Identification number or signatures of the sample used                                                                                                       |
| sample_state        | None | Physical state of the sample (e.g. 'gas', 'liquid', 'solution', 'amorphous solid', 'vitreous solid', 'monocrystalline solid', 'polycrystalline solid', etc.) |
| sample_purity       | None | Chemical purity of the sample                                                                                                                                |
| sample_surface_term | None | Surface termination of the sample (if crystalline)                                                                                                           |
| sample_layer        | None | Sample layer or bulk structure (e.g. 'bulk', 'monolayer', 'multilayer_2' for bilayer, 'multilayer_5' for pentalayer, 'heterostructure', etc.)                |
| sample_stacking     | None | Stacking order of the solid surface (if crystalline)                                                                                                         |
| sample_space_group  | None | Space group of the sample compound (if crystalline)                                                                                                          |
| chem_formula        | None | Chemical formula of the sample                                                                                                                               |
| chem_elements       | None | Symbols of the chemical elements contained in the sample                                                                                                     |
| chem_name           | None | Full chemical name of the sample                                                                                                                             |
| chem_id_cas         | None | CAS registry number of the sample's chemical content                                                                                                         |
| sample_temp         | K    | Temperature of the sample at the time of measurement                                                                                                         |
| sample_pressure     | Pa   | Pressure surrounding the sample at the time of measurement                                                                                                   |
| growth_method       | None | Sample growth method (e.g. 'solution evaporation', 'chemical vapor transfer', 'molecular beam epitaxy', etc.)                                                |
| preparation_method  | None | Sample preparation method (e.g. 'in-vacuum cleaving', 'ex-vacuum cleaving', 'ion milling', etc.)                                                             |
| sample_vendor       | None | Name of the sample vendor (e.g. a company name or 'homemade')                                                                                                |
| substrate_material  | None | Material of the substrate the sample has immediate contact with                                                                                              |
| substrate_state     | None | State of matter of the substrate material (similar options as those in the sample_state parameter)                                                           |
| substrate_vendor    | None | Name of the substrate vendor (similar to options in sample_vendor)                                                                                           |

## References

1. Draxl, C. & Scheffler, M. NOMAD: The FAIR concept for big data-driven materials science. *MRS Bulletin* **43**, 676-682 (2018).
2. parser-mpes, <https://gitlab.mpcdf.mpg.de/rpx/parser-mpes>
